# Supplementary material
Source: Springer Nature journal article supplement (https://www.springermedizin.de/resource/supplementary/12968_2011_2032_MOESM5_ESM.pdf/9581188)

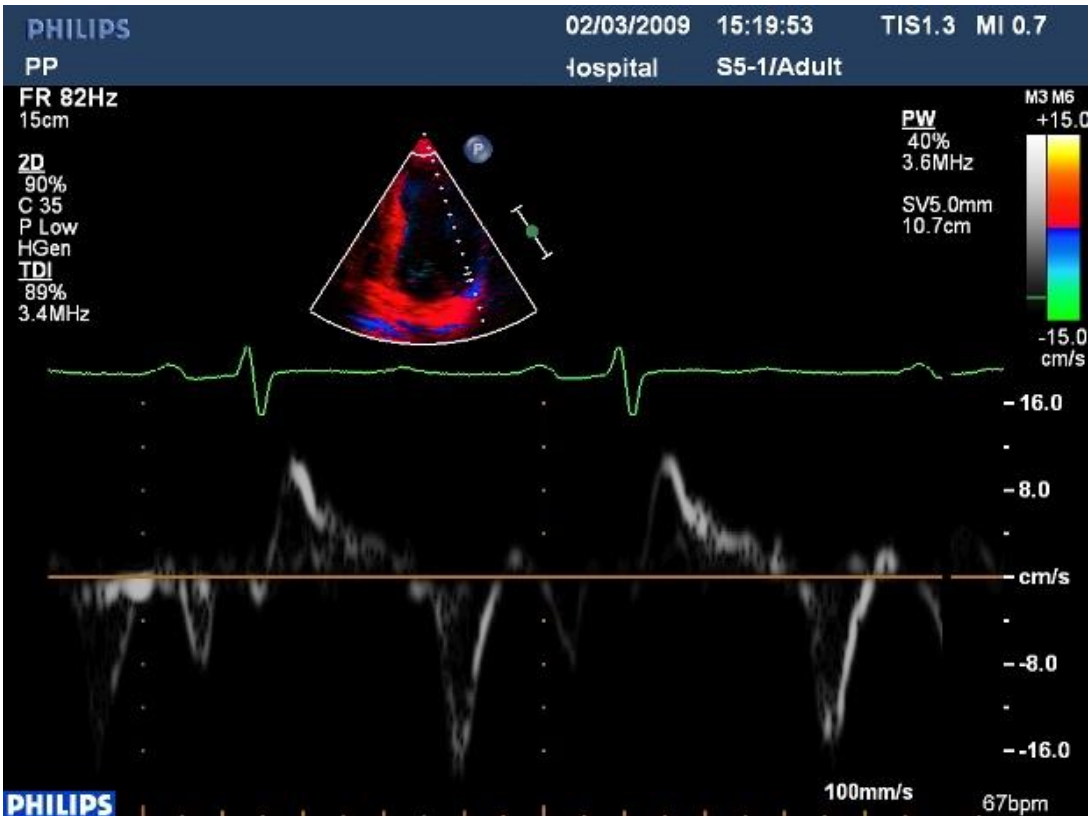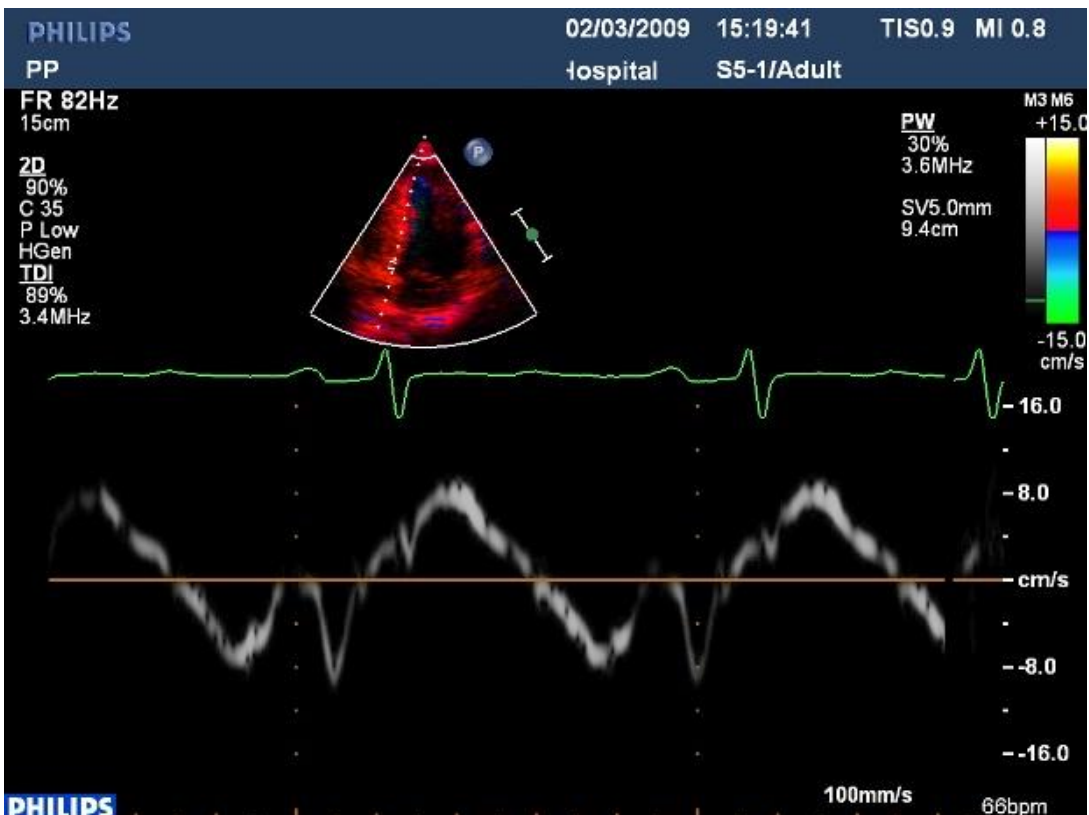

Supplement: MOESM5 [file 9581188]
